# Supplementary material
Source: PubMed Central journal article supplement (PMC3808469)

# Supplementary Fig. 1

**a**

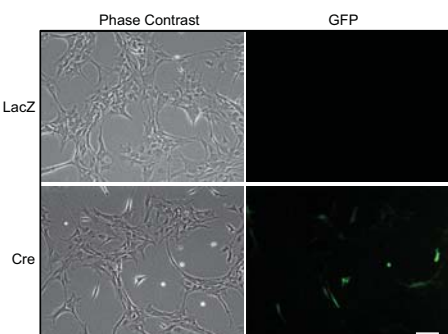

**b**

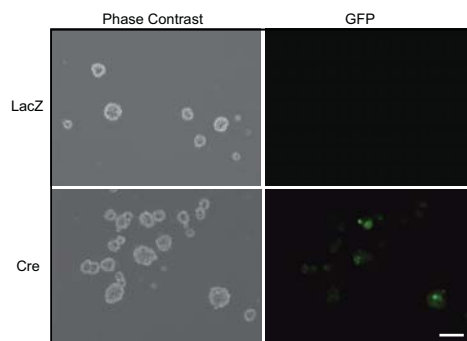

**c**

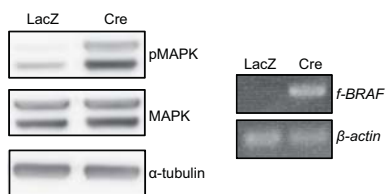

**d**

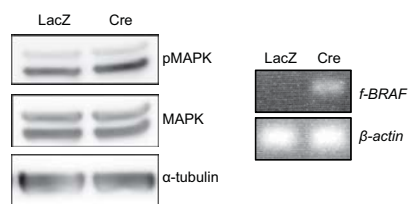

**e**

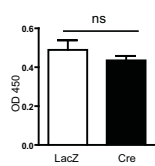

**f**

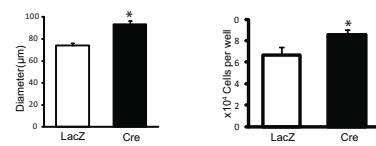

# Supplementary Fig. 2

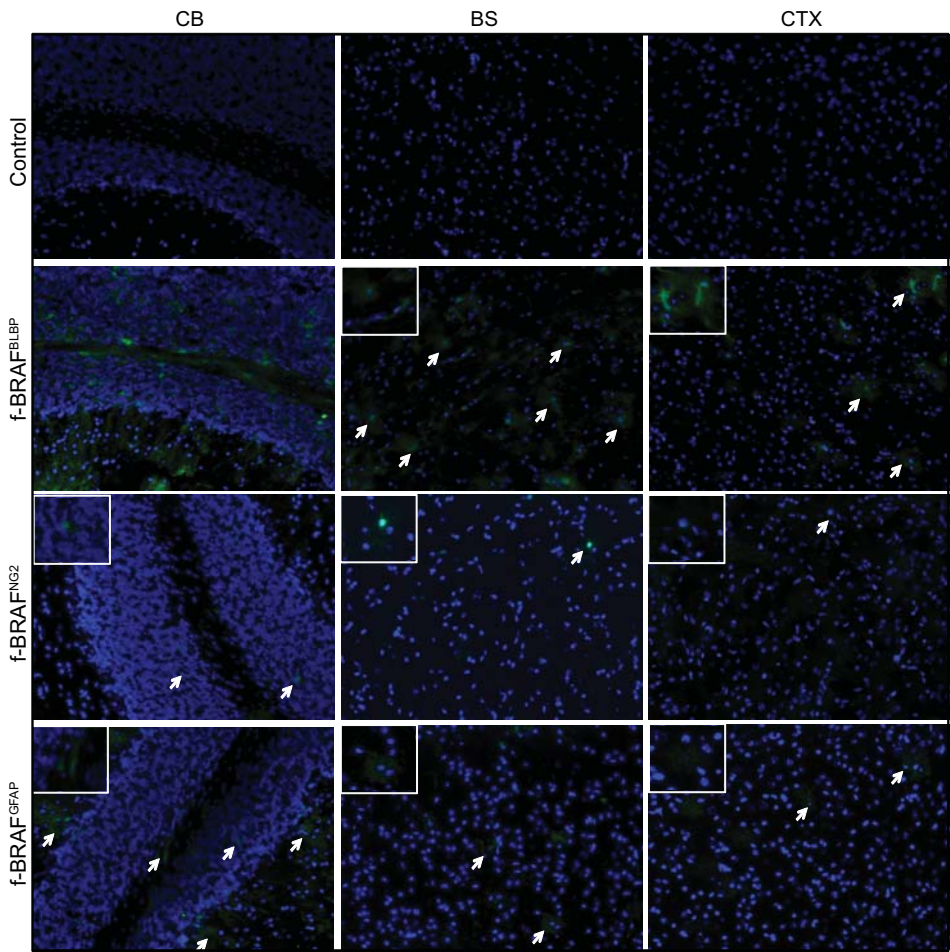

**a**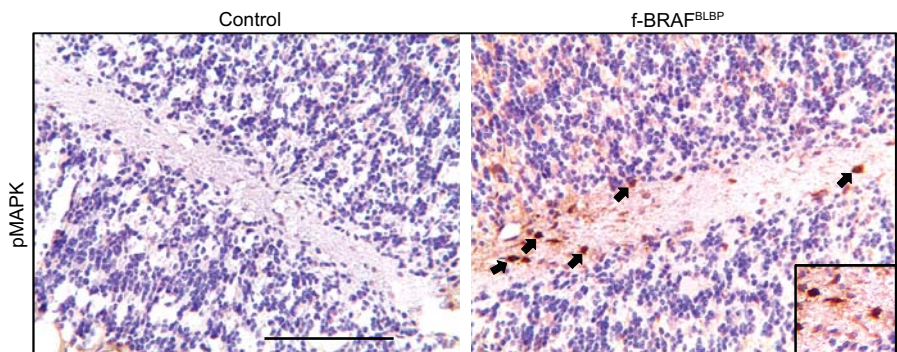**b**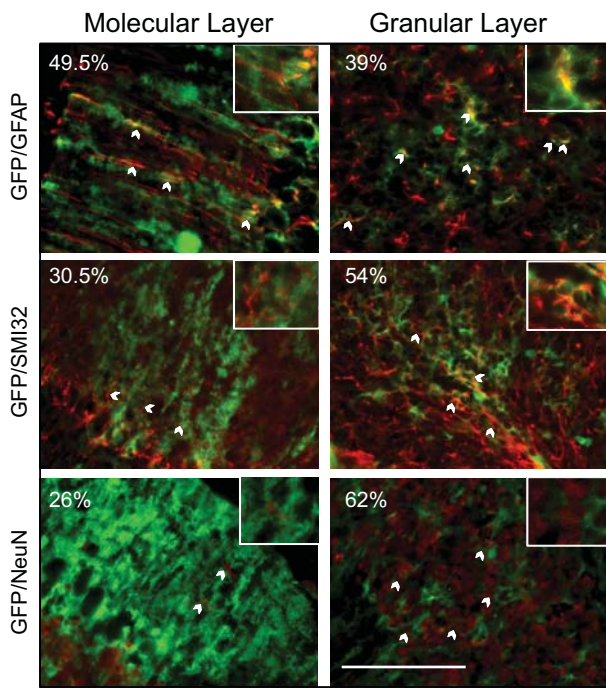

# Supplementary Fig. 4

**a**

Rosa-GREEN x BLBP-Cre

CTX

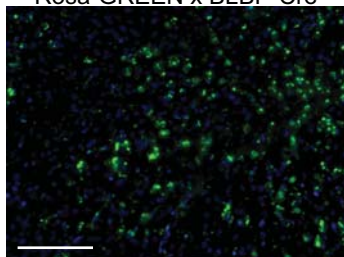

**b**

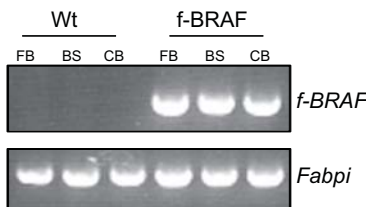

**c**

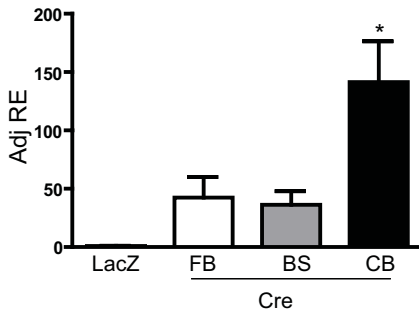

# Supplementary Fig. 5

**a**

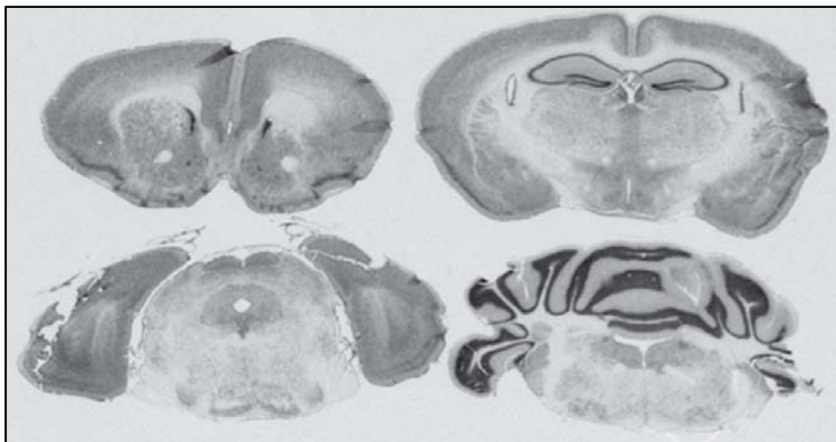

**b**

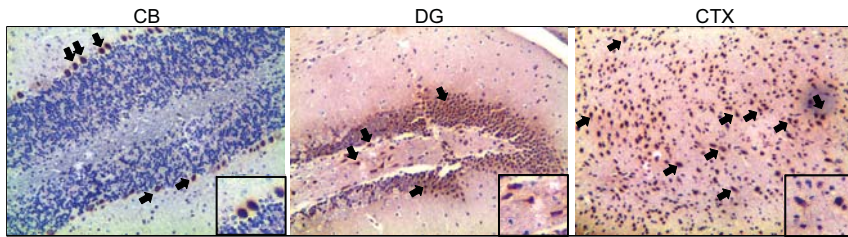

# Supplementary Fig. 6

**a**

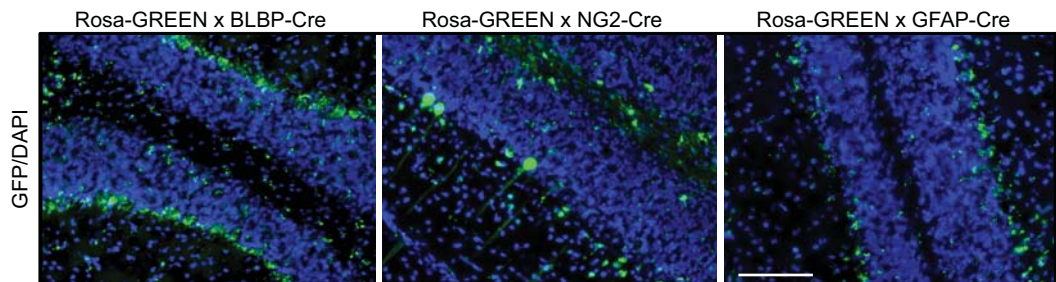

**b**

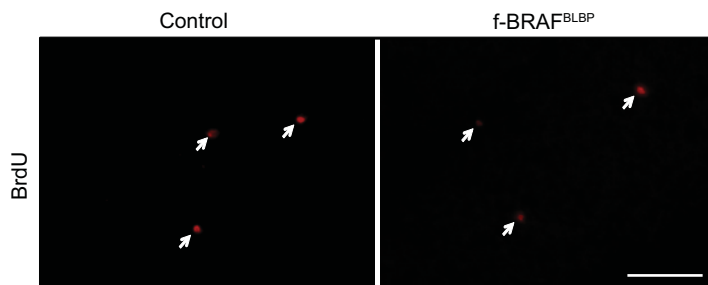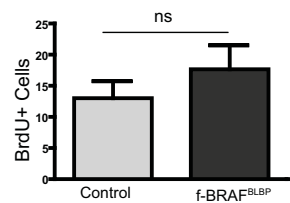

Supplement: NIHMS516378-supplement-Supp_Fig_S1-S6.pdf [file NIHMS516378-supplement-Supp_Fig_S1-S6.pdf]
